# Supplementary material for: High-rate cathode CrSSe based on anion reactions for lithium-ion batteries
Source: Royal Society of Chemistry journal article supplement (doi:10.1039/d0ta08012h), 2020-01-01
Supplement: d0ta08012h1.pdf [file d0ta08012h1.pdf]

## Supporting information

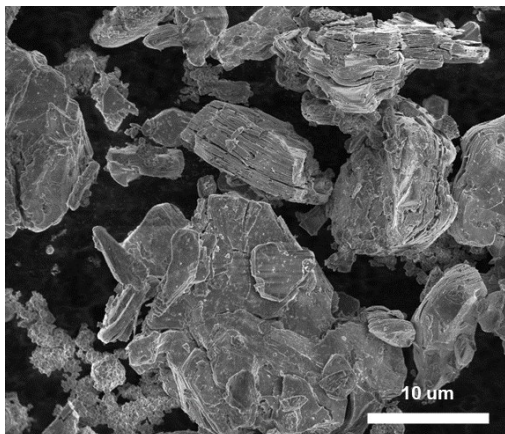

**Figure S1.** SEM image of the CrSSe powder.

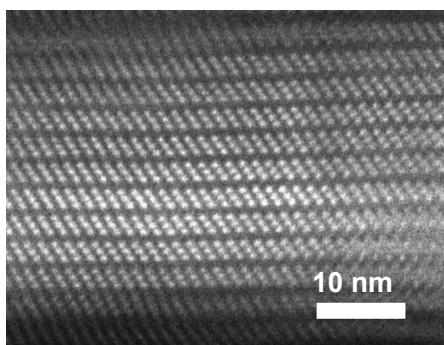

**Figure S2.** STEM image of CrSSe.

**Table S1.** Results of Rietveld refinement of CrSSe.

| Space group: P -3 m 1      Rwp=1.79%      Rp=1.37% $\chi^2=2.075$ |                  |          |                   |          |                                            |          |
|-------------------------------------------------------------------|------------------|----------|-------------------|----------|--------------------------------------------|----------|
| a=b=3.282867(387) Å                                               |                  |          | c=5.779645(851) Å |          | $\alpha=\beta=90^\circ$ $\gamma=120^\circ$ |          |
| V=53.943(17) Å                                                    |                  |          |                   |          |                                            |          |
| Atom                                                              | Wyckoff position | x/a      | y/b               | z/c      | Occupancy                                  | 100*Uiso |
| Cr1                                                               | 1a               | 0.000000 | 0.000000          | 0.036395 | 1.0                                        | 5,868    |
| S1                                                                | 1b               | 0.333333 | 0.666667          | 0.207528 | 0.5                                        | 20.615   |
| S2                                                                | 1c               | 0.666667 | 0.333333          | 0.764392 | 0.5                                        | -0.081   |
| Se1                                                               | 1b               | 0.333333 | 0.667667          | 0.219123 | 0.5                                        | 6.700    |
| Se2                                                               | 1c               | 0.666667 | 0.333333          | 0.765029 | 0.5                                        | -0.256   |

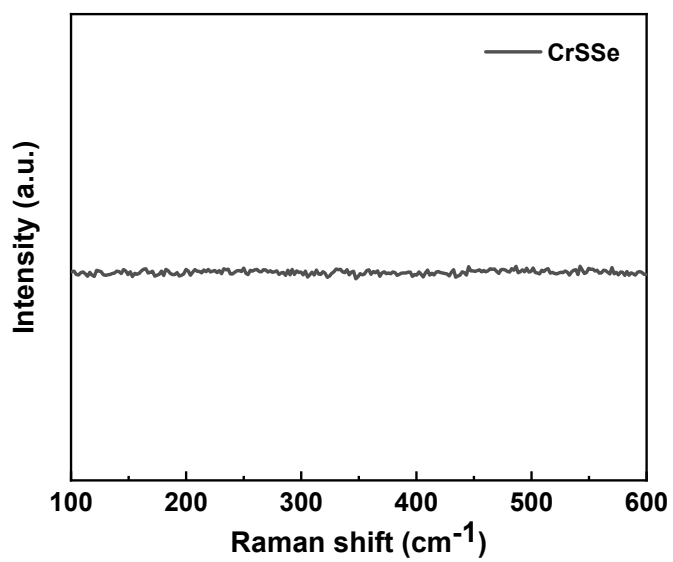

**Figure S3.** Raman spectrum of CrSSe.

**Figure S4.** The linear relationship between peak current and the square root of scan rate.



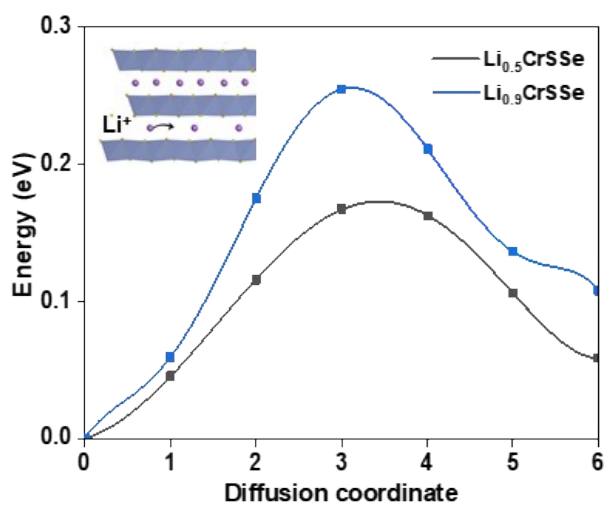

**Figure S5.** Calculated Li<sup>+</sup> diffusion barrier in Li<sub>x</sub>CrSSe (when x=0.5 and 0.9).

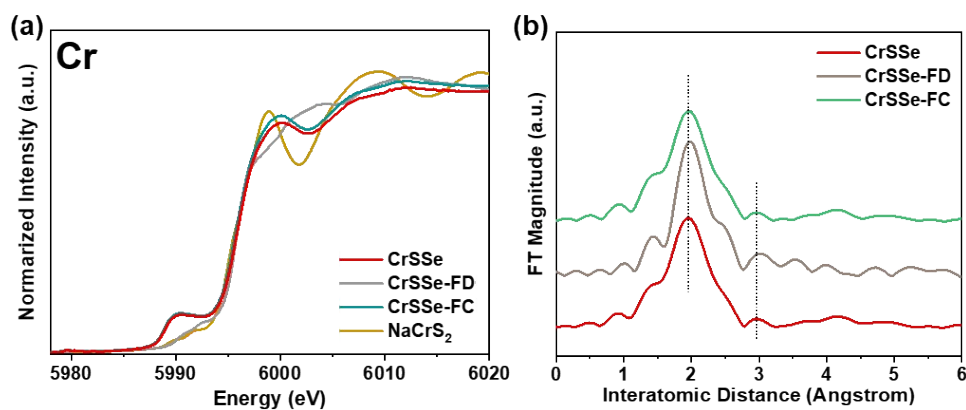

**Figure S6.** (a) Cr K-edge XANES for NaCrS<sub>2</sub> and various states of CrSSe electrodes; (b) corresponding FT-EXAFS spectrum for various states of CrSSe electrodes.

**Table S2.** Bond lengths of Cr-Cr and Cr-S/Se in Cr K-edge EXAFS spectrum of various states of CrSSe electrodes. (These values are ~0.4 Å shorter than the real ones, for they have not been phase corrected.)

|  | CrSSe | CrSSe-FD | CrSSe-FC |
|--|-------|----------|----------|
|  |       |          |          |

|         |      |      |      |
|---------|------|------|------|
| Cr-S/Se | 1.96 | 1.97 | 1.96 |
| Cr-Cr   | 2.97 | 3.01 | 2.97 |

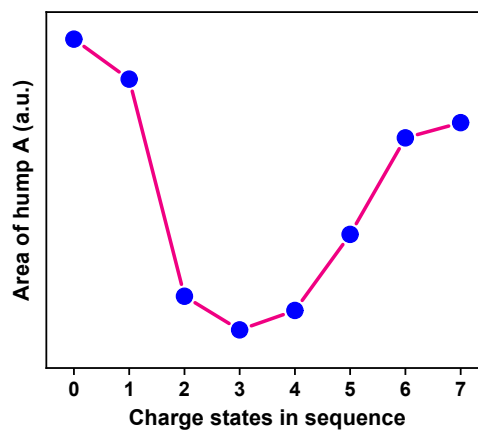

**Figure S7.** The variation of hump A area along with the charge states in sequence according to the S K-edge XAS spectrum of CrSSe electrode; linear fitting curves of two intermediated states.

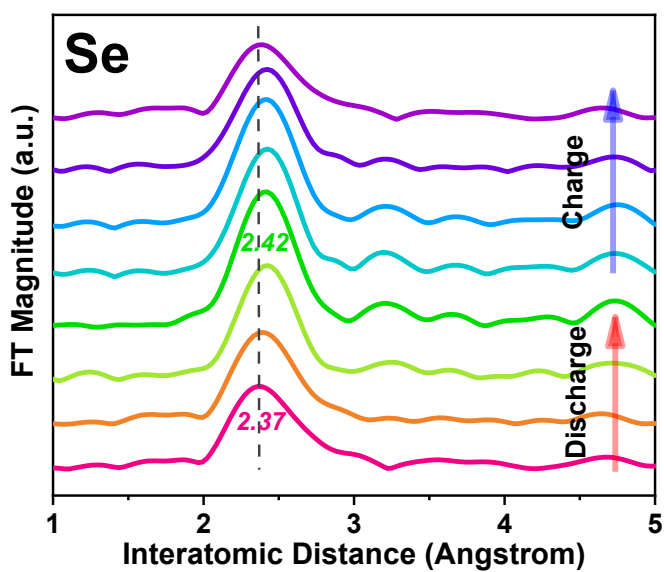

**Figure S8.** Se K-edge FT-EXAFS spectrum of CrSSe electrode.

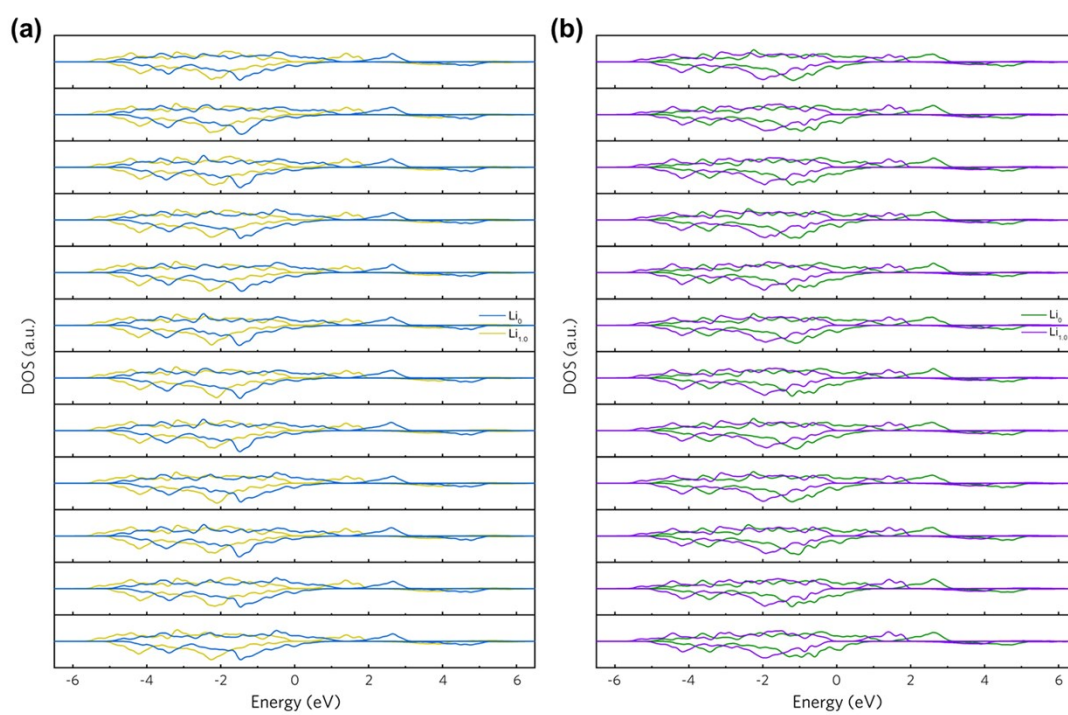

**Figure S9.** Partial density of states (PDOSs) of (a) S-3p and (b) Se-4p for CrSSe and LiCrSSe.

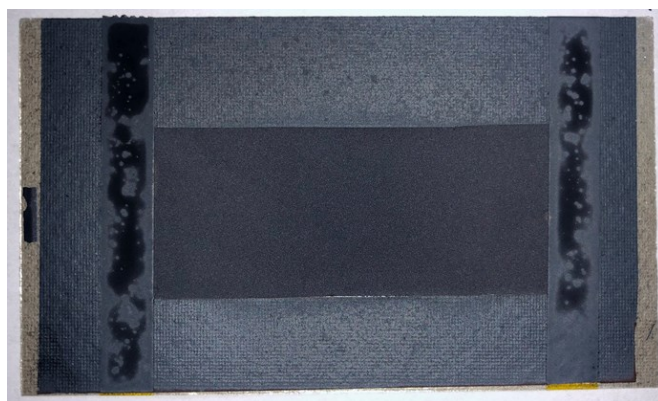

**Figure S10.** Photograph of CrSSe electrode coated with Fix.Li<sub>3</sub>N.

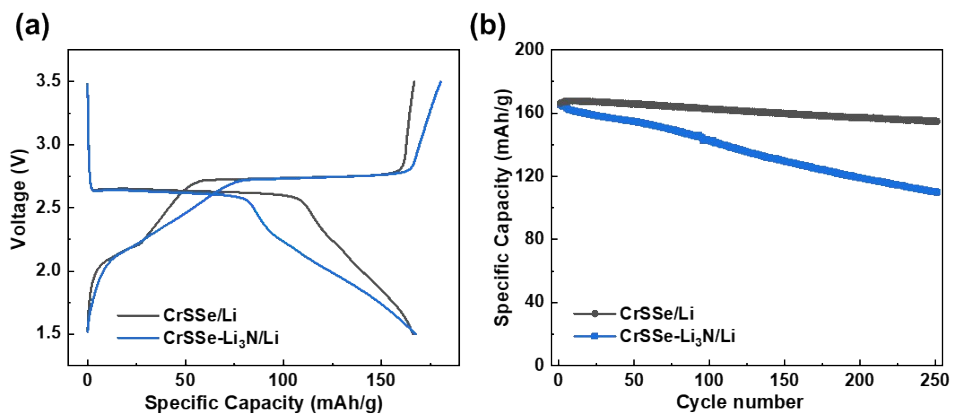

**Figure S11.** (a) Charge-discharge curves and (b) cycling performance of CrSSe-Li<sub>3</sub>N/Li half-cell.

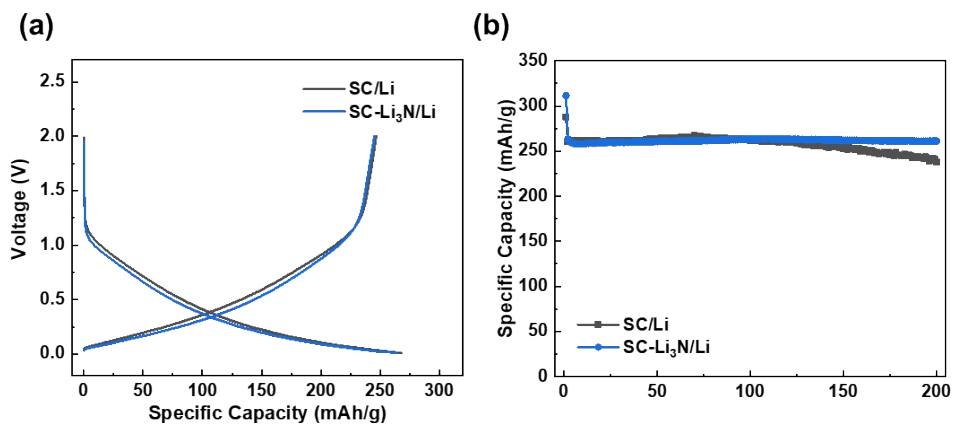

**Figure S12.** (a) Charge-discharge curves and (b) cycling performance of SC-Li<sub>3</sub>N/Li half-cell.
